# Supplementary material
Source: publisher figshare collection journal article supplement (https://geolsoc.figshare.com/articles/dataset/_/3454550)
Supplement: Supplementary file 2 [file 1]

Supplementary Data Table - Ion microprobe U/Pb data for zircon from orthogneiss, felsic sheet and pegmatite samples

|                                             | HfO <sub>2</sub><br>wt% | U<br>ppm | Th<br>ppm | Pb<br>ppm | Th/U | <sup>204</sup> Pb<br>ppb | f <sub>206</sub><br>(%) | <sup>204</sup> Pb/<br><sup>206</sup> Pb | Corrected Ratios                        |                          |                                         |                          |                    | Corrected Ratios                       |                          |                                        |                          |           | Uncorrected                            |                                         |                                         |    |      |    |      |        |        |        |        |
|---------------------------------------------|-------------------------|----------|-----------|-----------|------|--------------------------|-------------------------|-----------------------------------------|-----------------------------------------|--------------------------|-----------------------------------------|--------------------------|--------------------|----------------------------------------|--------------------------|----------------------------------------|--------------------------|-----------|----------------------------------------|-----------------------------------------|-----------------------------------------|----|------|----|------|--------|--------|--------|--------|
|                                             |                         |          |           |           |      |                          |                         |                                         | <sup>206</sup> Pb/<br><sup>207</sup> Pb | <sup>206</sup> Pb/<br>1σ | <sup>206</sup> Pb/<br><sup>208</sup> Pb | <sup>206</sup> Pb/<br>1σ | f <sub>206</sub> X | <sup>207</sup> Pb/<br><sup>235</sup> U | <sup>207</sup> Pb/<br>1σ | <sup>207</sup> Pb/<br><sup>238</sup> U | <sup>207</sup> Pb/<br>1σ | %<br>Disc | <sup>238</sup> U/<br><sup>206</sup> Pb | <sup>207</sup> Pb/<br><sup>206</sup> Pb | <sup>207</sup> Pb/<br><sup>206</sup> Pb | 1σ |      |    |      |        |        |        |        |
| <b>HA004 (OSGB Grid Ref 103130, 895135)</b> |                         |          |           |           |      |                          |                         |                                         |                                         |                          |                                         |                          |                    |                                        |                          |                                        |                          |           |                                        |                                         |                                         |    |      |    |      |        |        |        |        |
| <i>Inherited</i>                            |                         |          |           |           |      |                          |                         |                                         |                                         |                          |                                         |                          |                    |                                        |                          |                                        |                          |           |                                        |                                         |                                         |    |      |    |      |        |        |        |        |
| HA004-4_1                                   | 1.11                    | 36       | 27        | 25        | 0.77 | 1                        | 0.08                    | 0.0000408                               | 0.2134                                  | 0.0011                   | 0.2017                                  | 0.0018                   | 0.969              | 16.7354                                | 0.2656                   | 0.5688                                 | 0.0085                   | 0.95      | 2903                                   | 35                                      | 2920                                    | 15 | 2931 | 8  | 1.0  | 1.7568 | 0.0264 | 0.2143 | 0.0011 |
| <i>Magmatic (unaltered)</i>                 |                         |          |           |           |      |                          |                         |                                         |                                         |                          |                                         |                          |                    |                                        |                          |                                        |                          |           |                                        |                                         |                                         |    |      |    |      |        |        |        |        |
| HA004-1_1                                   | 1.34                    | 192      | 111       | 124       | 0.59 | 2                        | 0.04                    | 0.0000217                               | 0.2025                                  | 0.0004                   | 0.1604                                  | 0.0007                   | 0.990              | 15.2778                                | 0.2129                   | 0.5472                                 | 0.0075                   | 0.99      | 2814                                   | 31                                      | 2833                                    | 13 | 2846 | 3  | 1.1  | 1.8266 | 0.0252 | 0.2031 | 0.0004 |
| HA004-2_1                                   | 1.28                    | 228      | 71        | 134       | 0.32 | 1                        | 0.02                    | 0.0000083                               | 0.1999                                  | 0.0005                   | 0.0861                                  | 0.0004                   | 0.979              | 14.4674                                | 0.2081                   | 0.5249                                 | 0.0074                   | 0.98      | 2720                                   | 31                                      | 2781                                    | 14 | 2825 | 4  | 3.7  | 1.9047 | 0.0269 | 0.2004 | 0.0005 |
| HA004-3_1                                   | 1.44                    | 95       | 34        | 57        | 0.36 | 1                        | 0.03                    | 0.0000152                               | 0.2039                                  | 0.0012                   | 0.0963                                  | 0.0007                   | 0.967              | 15.0475                                | 0.2351                   | 0.5352                                 | 0.0078                   | 0.93      | 2763                                   | 33                                      | 2818                                    | 15 | 2857 | 9  | 3.3  | 1.8678 | 0.0272 | 0.2045 | 0.0011 |
| HA004-4_1                                   | 1.62                    | 259      | 45        | 150       | 0.18 | 1                        | 0.01                    | 0.0000061                               | 0.1999                                  | 0.0006                   | 0.0485                                  | 0.0006                   | 0.984              | 14.7981                                | 0.2110                   | 0.5370                                 | 0.0075                   | 0.98      | 2771                                   | 31                                      | 2802                                    | 13 | 2825 | 4  | 1.9  | 1.8619 | 0.0260 | 0.2003 | 0.0006 |
| HA004-7_1                                   | 1.13                    | 175      | 61        | 107       | 0.36 | 0                        | 0.00                    | 0.0000000                               | 0.2007                                  | 0.0008                   | 0.0967                                  | 0.0005                   | 0.991              | 15.0234                                | 0.2220                   | 0.5428                                 | 0.0077                   | 0.96      | 2795                                   | 32                                      | 2817                                    | 14 | 2832 | 6  | 1.3  | 1.8422 | 0.0263 | 0.2011 | 0.0006 |
| HA004-8_1                                   | 1.54                    | 321      | 87        | 191       | 0.28 | 2                        | 0.02                    | 0.0000118                               | 0.2002                                  | 0.0004                   | 0.0771                                  | 0.0004                   | 1.017              | 14.9314                                | 0.2107                   | 0.5410                                 | 0.0076                   | 0.99      | 2788                                   | 32                                      | 2811                                    | 13 | 2827 | 3  | 1.4  | 1.8481 | 0.0258 | 0.2007 | 0.0004 |
| HA004-10_1                                  | 1.28                    | 198      | 115       | 122       | 0.60 | 10                       | 0.20                    | 0.0001077                               | 0.2021                                  | 0.0007                   | 0.1579                                  | 0.0020                   | 0.963              | 14.5495                                | 0.2051                   | 0.5222                                 | 0.0071                   | 0.97      | 2708                                   | 30                                      | 2786                                    | 13 | 2843 | 5  | 4.7  | 1.9112 | 0.0262 | 0.2038 | 0.0007 |
| HA004-12_1                                  | 1.49                    | 451      | 164       | 282       | 0.37 | 1                        | 0.01                    | 0.0000055                               | 0.1993                                  | 0.0005                   | 0.0998                                  | 0.0006                   | 0.983              | 15.2463                                | 0.2138                   | 0.5548                                 | 0.0076                   | 0.98      | 2845                                   | 32                                      | 2831                                    | 13 | 2820 | 4  | -0.9 | 1.8024 | 0.0248 | 0.1998 | 0.0005 |
| HA004-13_1                                  | 1.32                    | 229      | 80        | 138       | 0.36 | 2                        | 0.03                    | 0.0000181                               | 0.2004                                  | 0.0004                   | 0.0958                                  | 0.0005                   | 0.980              | 14.7863                                | 0.2091                   | 0.5350                                 | 0.0075                   | 0.99      | 2763                                   | 31                                      | 2802                                    | 13 | 2829 | 3  | 2.3  | 1.8684 | 0.0262 | 0.2011 | 0.0004 |
| <i>Magmatic (partly altered)</i>            |                         |          |           |           |      |                          |                         |                                         |                                         |                          |                                         |                          |                    |                                        |                          |                                        |                          |           |                                        |                                         |                                         |    |      |    |      |        |        |        |        |
| HA004-9_1                                   | 1.98                    | 180      | 18        | 102       | 0.10 | 1                        | 0.03                    | 0.0000169                               | 0.2009                                  | 0.0004                   | 0.0273                                  | 0.0004                   | 0.952              | 14.7304                                | 0.2105                   | 0.5318                                 | 0.0075                   | 0.99      | 2749                                   | 32                                      | 2798                                    | 13 | 2833 | 3  | 3.0  | 1.8798 | 0.0266 | 0.2015 | 0.0004 |
| HA004-5_1                                   | 1.67                    | 1007     | 14        | 533       | 0.01 | 5                        | 0.02                    | 0.0000109                               | 0.1871                                  | 0.0004                   | 0.0038                                  | 0.0002                   | 0.952              | 13.2484                                | 0.1828                   | 0.5135                                 | 0.0070                   | 0.99      | 2671                                   | 30                                      | 2698                                    | 13 | 2717 | 3  | 1.7  | 1.9472 | 0.0265 | 0.1876 | 0.0004 |
| HA004-12_2                                  | 1.90                    | 822      | 209       | 441       | 0.26 | 9                        | 0.05                    | 0.0000259                               | 0.1846                                  | 0.0003                   | 0.0708                                  | 0.0010                   | 0.980              | 12.5504                                | 0.1726                   | 0.4930                                 | 0.0067                   | 0.99      | 2584                                   | 29                                      | 2647                                    | 13 | 2694 | 3  | 4.1  | 2.0275 | 0.0277 | 0.1853 | 0.0003 |
| HA004-14_1                                  | 1.64                    | 778      | 46        | 410       | 0.06 | 2                        | 0.01                    | 0.0000070                               | 0.1803                                  | 0.0005                   | 0.0152                                  | 0.0003                   | 0.917              | 12.6609                                | 0.1759                   | 0.5092                                 | 0.0069                   | 0.98      | 2653                                   | 29                                      | 2655                                    | 13 | 2655 | 5  | 0.1  | 1.9636 | 0.0267 | 0.1808 | 0.0005 |
| HA004-11_1                                  | 1.43                    | 1984     | 1204      | 660       | 0.62 | 3128                     | 10.14                   | 0.0060367                               | 0.0991                                  | 0.0010                   | 0.1854                                  | 0.0086                   | 1.024              | 4.1115                                 | 0.0703                   | 0.3008                                 | 0.0041                   | 0.80      | 1695                                   | 20                                      | 1657                                    | 14 | 1607 | 32 | -5.5 | 2.9872 | 0.0408 | 0.1742 | 0.0017 |
| HA004-15_1                                  | 1.86                    | 844      | 18        | 349       | 0.02 | 95                       | 0.59                    | 0.0003148                               | 0.1540                                  | 0.0012                   | 0.0053                                  | 0.0008                   | 0.868              | 8.7383                                 | 0.1172                   | 0.4114                                 | 0.0045                   | 0.81      | 2221                                   | 20                                      | 2311                                    | 12 | 2391 | 13 | 7.1  | 2.4163 | 0.0264 | 0.1583 | 0.0012 |
| HA004-3_2                                   | 1.07                    | 80       | 21        | 37        | 0.37 | 0                        | 0.00                    | 0.0000000                               | 0.1994                                  | 0.0010                   | 0.0978                                  | 0.0006                   | 0.973              | 14.9190                                | 0.2328                   | 0.5425                                 | 0.0080                   | 0.95      | 2794                                   | 33                                      | 2810                                    | 15 | 2821 | 8  | 1.0  | 1.8433 | 0.0272 | 0.1998 | 0.0010 |
| HA004-16_1                                  | 1.56                    | 1543     | 533       | 474       | 0.35 | 104                      | 0.50                    | 0.0002663                               | 0.1037                                  | 0.0002                   | 0.0969                                  | 0.0031                   | 0.938              | 4.1956                                 | 0.0402                   | 0.2934                                 | 0.0027                   | 0.97      | 1658                                   | 14                                      | 1673                                    | 8  | 1691 | 4  | 1.9  | 3.3918 | 0.0316 | 0.1076 | 0.0002 |
| <b>HA010 (OSGB Grid Ref 102585, 894950)</b> |                         |          |           |           |      |                          |                         |                                         |                                         |                          |                                         |                          |                    |                                        |                          |                                        |                          |           |                                        |                                         |                                         |    |      |    |      |        |        |        |        |
| <i>Magmatic cores</i>                       |                         |          |           |           |      |                          |                         |                                         |                                         |                          |                                         |                          |                    |                                        |                          |                                        |                          |           |                                        |                                         |                                         |    |      |    |      |        |        |        |        |
| HA010-1_1                                   | 1.61                    | 387      | 58        | 220       | 0.15 | 3                        | 0.04                    | 0.0000190                               | 0.1907                                  | 0.0006                   | 0.0401                                  | 0.0004                   | 0.949              | 13.9718                                | 0.1701                   | 0.5314                                 | 0.0063                   | 0.97      | 2747                                   | 26                                      | 2748                                    | 11 | 2748 | 4  | 0.0  | 1.8811 | 0.0222 | 0.1913 | 0.0005 |
| HA010-4_1                                   | 1.48                    | 292      | 84        | 170       | 0.30 | 2                        | 0.03                    | 0.0000144                               | 0.1913                                  | 0.0005                   | 0.0799                                  | 0.0004                   | 0.988              | 13.9274                                | 0.1915                   | 0.5280                                 | 0.0071                   | 0.98      | 2733                                   | 30                                      | 2743                                    | 13 | 2753 | 4  | 0.7  | 1.8935 | 0.0256 | 0.1919 | 0.0005 |
| HA010-8_1                                   | 1.20                    | 261      | 254       | 177       | 1.00 | 4                        | 0.07                    | 0.0000368                               | 0.1928                                  | 0.0005                   | 0.2674                                  | 0.0012                   | 0.979              | 14.1748                                | 0.1991                   | 0.5332                                 | 0.0074                   | 0.98      | 2755                                   | 31                                      | 2761                                    | 13 | 2766 | 4  | 0.4  | 1.8743 | 0.0259 | 0.1937 | 0.0005 |
| HA010-9_1                                   | 1.10                    | 63       | 35        | 42        | 0.58 | 2                        | 0.15                    | 0.0000783                               | 0.2003                                  | 0.0013                   | 0.1459                                  | 0.0022                   | 0.930              | 15.7226                                | 0.2587                   | 0.5893                                 | 0.0086                   | 0.92      | 2905                                   | 35                                      | 2860                                    | 16 | 2828 | 10 | -2.7 | 1.7538 | 0.0264 | 0.2016 | 0.0013 |
| HA010-10_1                                  | 1.44                    | 155      | 102       | 99        | 0.67 | 3                        | 0.07                    | 0.0000373                               | 0.1959                                  | 0.0008                   | 0.1794                                  | 0.0011                   | 0.973              | 14.3389                                | 0.2133                   | 0.5308                                 | 0.0076                   | 0.96      | 2745                                   | 32                                      | 2772                                    | 14 | 2792 | 7  | 1.7  | 1.8828 | 0.0269 | 0.1968 | 0.0008 |
| HA010-11_1                                  | 1.35                    | 252      | 254       | 173       | 1.04 | 2                        | 0.03                    | 0.0000144                               | 0.1947                                  | 0.0005                   | 0.2879                                  | 0.0007                   | 1.017              | 14.4754                                | 0.1409                   | 0.5394                                 | 0.0050                   | 0.96      | 2781                                   | 21                                      | 2781                                    | 9  | 2781 | 5  | 0.0  | 1.8536 | 0.0173 | 0.1952 | 0.0005 |
| HA010-12_1                                  | 1.27                    | 364      | 337       | 245       | 0.95 | 1                        | 0.01                    | 0.0000067                               | 0.1914                                  | 0.0004                   | 0.2630                                  | 0.0008                   | 1.010              | 14.1511                                | 0.1327                   | 0.5363                                 | 0.0049                   | 0.98      | 2768                                   | 21                                      | 2760                                    | 9  | 2754 | 3  | -0.5 | 1.8645 | 0.0171 | 0.1918 | 0.0004 |
| HA010-13_1                                  | 1.27                    | 199      | 291       | 150       | 1.50 | 0                        | 0.01                    | 0.0000048                               | 0.1920                                  | 0.0006                   | 0.4166                                  | 0.0043                   | 1.017              | 14.4316                                | 0.1436                   | 0.5452                                 | 0.0052                   | 0.96      | 2805                                   | 22                                      | 2779                                    | 9  | 2759 | 5  | -1.7 | 1.8342 | 0.0175 | 0.1924 | 0.0006 |
| HA010-18_1                                  | 1.54                    | 434      | 96        | 245       | 0.23 | 64                       | 0.61                    | 0.0003283                               | 0.1903                                  | 0.0004                   | 0.0615                                  | 0.0024                   | 0.987              | 13.6873                                | 0.1673                   | 0.5216                                 | 0.0063                   | 0.98      | 2706                                   | 27                                      | 2728                                    | 12 | 2744 | 4  | 1.4  | 1.9054 | 0.0229 | 0.1946 | 0.0004 |
| HA010-19_1                                  | 1.31                    | 178      | 117       | 116       | 0.67 | 1                        | 0.01                    | 0.0000073                               | 0.1959                                  | 0.0005                   | 0.1869                                  | 0.0006                   | 1.019              | 14.7280                                | 0.1804                   | 0.5452                                 | 0.0065                   | 0.97      | 2805                                   | 27                                      | 2798                                    | 12 | 2792 | 5  | -0.5 | 1.8339 | 0.0219 | 0.1964 | 0.0005 |
| HA010-21_1                                  | 1.22                    | 240      | 193       | 159       | 0.83 | 0                        | 0.01                    | 0.0000034                               | 0.1951                                  | 0.0005                   | 0.2155                                  | 0.0016                   | 0.953              | 14.5443                                | 0.4065                   | 0.5407                                 | 0.0150                   | 1.00      | 2787                                   | 63                                      | 2786                                    | 26 | 2785 | 4  | -0.1 | 1.8492 | 0.0514 | 0.1955 | 0.0005 |
| HA010-23_1                                  | 1.34                    | 187      | 120       | 121       | 0.66 | 0                        | 0.01                    | 0.0000052                               | 0.1930                                  | 0.0006                   | 0.1765                                  | 0.0005                   | 0.981              | 14.5066                                | 0.2259                   | 0.5452                                 | 0.0083                   | 0.98      | 2805                                   | 35                                      | 2783                                    | 15 | 2767 | 6  | -1.4 | 1.8340 | 0.0279 | 0.1934 | 0.0006 |
| <i>Metamorphic mantles/rims</i>             |                         |          |           |           |      |                          |                         |                                         |                                         |                          |                                         |                          |                    |                                        |                          |                                        |                          |           |                                        |                                         |                                         |    |      |    |      |        |        |        |        |
| HA010-2_1                                   | 1.36                    | 45       | 85        | 34        | 1.95 | 0                        | 0.00                    | 0.0000018                               | 0.1864                                  | 0.0011                   | 0.5224                                  | 0.0035                   | 0.974              | 13.3183                                | 0.2051                   | 0.5162                                 | 0.0074                   | 0.92      | 2692                                   | 31                                      | 2702                                    | 14 | 2710 | 10 | 0.7  | 1.9296 | 0.0274 | 0.1868 | 0.0011 |
| HA010-3_1                                   | 1.45                    | 113      | 59        | 66        | 0.53 | 4                        | 0.16                    | 0.0000659                               | 0.1934                                  | 0.0007                   | 0.1452                                  | 0.0018                   | 0.985              | 12.7863                                | 0.1851                   | 0.5056                                 | 0.0070                   | 0.96      | 2638                                   | 30                                      | 2664                                    | 14 | 2683 | 7  | 1.7  | 1.9746 | 0.0275 | 0.1848 | 0.0007 |
| HA010-5_1                                   | 1.37                    | 42       | 56        | 29        | 1.35 | 1                        | 0.11                    | 0.0000586                               | 0.1859                                  | 0.0014                   | 0.3670                                  | 0.0023                   | 0.992              | 13.2151                                | 0.2335                   | 0.5155                                 | 0.0082                   | 0.90      | 2680                                   | 35                                      | 2695                                    | 17 | 2706 | 12 | 1.0  | 1.9376 | 0.0307 | 0.1870 | 0.0014 |
| HA010-6_1                                   | 1.39                    | 37       | 51        | 27        | 1.41 | 1                        | 0.10                    | 0.0000541                               | 0.1883                                  | 0.0013                   | 0.3819                                  | 0.0027                   | 0.990              | 13.8615                                | 0.2274                   | 0.5339                                 | 0.0079                   | 0.90      | 2758                                   | 33                                      | 2740                                    | 15 | 2727 | 11 | -1.1 | 1.8710 | 0.0277 | 0.1893 | 0.0013 |
| HA010-7_1                                   | 1.35                    | 33       | 72        | 27        | 2.25 | 0                        | 0.00                    | 0.0000019                               | 0.1901                                  | 0.0012                   | 0.6146                                  | 0.0026                   | 0.998              | 13.9627                                | 0.2314                   | 0.5328                                 | 0.0081                   | 0.92      | 2753                                   | 34                                      | 2747                                    | 16 | 2742 | 11 | -0.4 | 1.8770 | 0.0287 | 0.1895 | 0.0012 |
| HA010-14_1                                  | 1.39                    | 69       | 64        | 41        | 0.95 | 3                        | 0.1                     |                                         |                                         |                          |                                         |                          |                    |                                        |                          |                                        |                          |           |                                        |                                         |                                         |    |      |    |      |        |        |        |        |

Supplementary Table 2 - Ion microprobe U/Pb data for zircon from orthogneiss, felsic sheet and pegmatite samples

|                                             | HfO <sub>2</sub><br>wt% | U<br>ppm | Th<br>ppm | Pb<br>ppm | Th/U | <sup>204</sup> Pb/<br>ppb | f <sub>206</sub><br>(%) | <sup>204</sup> Pb/<br><sup>206</sup> Pb | Corrected Ratios                        |                          |                                         |        |                    | Corrected Ratios                       |                                        |        |                                        |      | Uncorrected                             |           |                                        |    |                                         |    |      |        |        |        |        |
|---------------------------------------------|-------------------------|----------|-----------|-----------|------|---------------------------|-------------------------|-----------------------------------------|-----------------------------------------|--------------------------|-----------------------------------------|--------|--------------------|----------------------------------------|----------------------------------------|--------|----------------------------------------|------|-----------------------------------------|-----------|----------------------------------------|----|-----------------------------------------|----|------|--------|--------|--------|--------|
|                                             |                         |          |           |           |      |                           |                         |                                         | <sup>206</sup> Pb/<br><sup>207</sup> Pb | <sup>206</sup> Pb/<br>1g | <sup>207</sup> Pb/<br><sup>206</sup> Pb | 1g     | f <sub>207</sub> X | <sup>207</sup> Pb/<br><sup>235</sup> U | <sup>206</sup> Pb/<br><sup>238</sup> U | 1g     | <sup>207</sup> Pb/<br><sup>235</sup> U | 1g   | <sup>207</sup> Pb/<br><sup>206</sup> Pb | %<br>Disc | <sup>238</sup> U/<br><sup>206</sup> Pb | 1g | <sup>207</sup> Pb/<br><sup>206</sup> Pb | 1g |      |        |        |        |        |
| <b>HA006 (OSGB Grid Ref 103130, 895135)</b> |                         |          |           |           |      |                           |                         |                                         |                                         |                          |                                         |        |                    |                                        |                                        |        |                                        |      |                                         |           |                                        |    |                                         |    |      |        |        |        |        |
| <i>Inherited cores</i>                      |                         |          |           |           |      |                           |                         |                                         |                                         |                          |                                         |        |                    |                                        |                                        |        |                                        |      |                                         |           |                                        |    |                                         |    |      |        |        |        |        |
| HA006-16_1                                  | 1.22                    | 111      | 58        | 108       | 0.53 | 1                         | 0.02                    | 0.0000094                               | 0.3339                                  | 0.0014                   | 0.1370                                  | 0.0009 | 0.988              | 34.9649                                | 0.3613                                 | 0.7594 | 0.0072                                 | 0.92 | 3642                                    | 26        | 3638                                   | 10 | 3635                                    | 6  | -0.2 | 1.3166 | 0.0125 | 0.3347 | 0.0014 |
| HA006-16_2                                  | 1.32                    | 73       | 44        | 64        | 0.63 | 1                         | 0.06                    | 0.0000316                               | 0.3068                                  | 0.0011                   | 0.1596                                  | 0.0013 | 0.966              | 29.0060                                | 0.5404                                 | 0.6857 | 0.0125                                 | 0.98 | 3366                                    | 48        | 3454                                   | 18 | 3504                                    | 6  | 3.9  | 1.4575 | 0.0266 | 0.3077 | 0.0011 |
| HA006-16_3                                  | 1.22                    | 95       | 52        | 91        | 0.56 | 4                         | 0.11                    | 0.0000597                               | 0.3362                                  | 0.0011                   | 0.1464                                  | 0.0014 | 0.996              | 34.5744                                | 0.6442                                 | 0.7458 | 0.0137                                 | 0.99 | 3592                                    | 50        | 3627                                   | 18 | 3645                                    | 5  | 1.5  | 1.3393 | 0.0246 | 0.3375 | 0.0011 |
| HA006-18_1                                  | 1.01                    | 142      | 86        | 92        | 0.62 | 10                        | 0.28                    | 0.0001485                               | 0.2161                                  | 0.0007                   | 0.1694                                  | 0.0021 | 0.992              | 16.1091                                | 0.2970                                 | 0.5406 | 0.0098                                 | 0.98 | 2786                                    | 41        | 2883                                   | 17 | 2952                                    | 5  | 5.6  | 1.8448 | 0.0334 | 0.2183 | 0.0007 |
| HA006-19_1                                  | 1.42                    | 370      | 159       | 259       | 0.44 | 5                         | 0.04                    | 0.0000237                               | 0.2233                                  | 0.0012                   | 0.1160                                  | 0.0008 | 0.978              | 18.5861                                | 0.3740                                 | 0.6037 | 0.0117                                 | 0.96 | 3045                                    | 47        | 3021                                   | 19 | 3004                                    | 9  | -1.4 | 1.6558 | 0.0321 | 0.2240 | 0.0012 |
| HA006-19_2                                  | 1.47                    | 501      | 172       | 339       | 0.35 | 4                         | 0.03                    | 0.0000175                               | 0.2252                                  | 0.0007                   | 0.0934                                  | 0.0005 | 0.983              | 18.3577                                | 0.3368                                 | 0.5913 | 0.0107                                 | 0.99 | 2995                                    | 43        | 3009                                   | 18 | 3017                                    | 5  | 0.7  | 1.6905 | 0.0306 | 0.2258 | 0.0007 |
| HA006B-48_1                                 | 1.05                    | 117      | 68        | 80        | 0.60 | 1                         | 0.02                    | 0.0000100                               | 0.2124                                  | 0.0009                   | 0.1631                                  | 0.0023 | 1.006              | 16.7725                                | 0.2771                                 | 0.5728 | 0.0091                                 | 0.96 | 2919                                    | 37        | 2922                                   | 16 | 2923                                    | 7  | 0.1  | 1.7455 | 0.0278 | 0.2129 | 0.0009 |
| <i>Magmatic grains</i>                      |                         |          |           |           |      |                           |                         |                                         |                                         |                          |                                         |        |                    |                                        |                                        |        |                                        |      |                                         |           |                                        |    |                                         |    |      |        |        |        |        |
| HA006-4_2                                   | 1.18                    | 41       | 16        | 26        | 0.41 | 1                         | 0.07                    | 0.0000386                               | 0.2079                                  | 0.0012                   | 0.1101                                  | 0.0012 | 0.995              | 15.7063                                | 0.2147                                 | 0.5480 | 0.0068                                 | 0.91 | 2817                                    | 28        | 2859                                   | 13 | 2889                                    | 8  | 2.5  | 1.8235 | 0.0227 | 0.2087 | 0.0011 |
| HA006B-34_4                                 | 1.23                    | 83       | 11        | 50        | 0.14 | 3                         | 0.16                    | 0.0000869                               | 0.2061                                  | 0.0008                   | 0.0362                                  | 0.0015 | 0.975              | 15.9402                                | 0.2597                                 | 0.5609 | 0.0089                                 | 0.97 | 2870                                    | 37        | 2873                                   | 15 | 2875                                    | 6  | 0.2  | 1.7799 | 0.0281 | 0.2075 | 0.0008 |
| HA006-3_1                                   | 1.15                    | 112      | 49        | 69        | 0.45 | 1                         | 0.03                    | 0.0000169                               | 0.2058                                  | 0.0010                   | 0.1211                                  | 0.0008 | 0.990              | 15.1878                                | 0.1646                                 | 0.5352 | 0.0052                                 | 0.89 | 2763                                    | 22        | 2827                                   | 10 | 2872                                    | 8  | 3.8  | 1.8679 | 0.0181 | 0.2064 | 0.0010 |
| HA006-10_1                                  | 1.07                    | 139      | 81        | 93        | 0.60 | 0                         | 0.01                    | 0.0000064                               | 0.2058                                  | 0.0008                   | 0.1620                                  | 0.0007 | 1.002              | 16.0808                                | 0.1643                                 | 0.5666 | 0.0054                                 | 0.92 | 2894                                    | 22        | 2882                                   | 10 | 2872                                    | 7  | -0.8 | 1.7646 | 0.0167 | 0.2063 | 0.0008 |
| HA006B-34_1                                 | 1.21                    | 87       | 12        | 52        | 0.14 | 2                         | 0.08                    | 0.0000415                               | 0.2056                                  | 0.0007                   | 0.0379                                  | 0.0009 | 0.990              | 15.7579                                | 0.2299                                 | 0.5559 | 0.0079                                 | 0.97 | 2850                                    | 32        | 2862                                   | 14 | 2871                                    | 5  | 0.7  | 1.7976 | 0.0254 | 0.2065 | 0.0007 |
| HA006-4_1                                   | 1.00                    | 85       | 48        | 55        | 0.58 | 0                         | 0.01                    | 0.0000063                               | 0.2055                                  | 0.0011                   | 0.1555                                  | 0.0007 | 0.992              | 15.6510                                | 0.1760                                 | 0.5524 | 0.0055                                 | 0.89 | 2835                                    | 23        | 2856                                   | 11 | 2870                                    | 8  | 1.2  | 1.8101 | 0.0181 | 0.2060 | 0.0011 |
| HA006-8_1                                   | 1.03                    | 66       | 14        | 39        | 0.21 | 2                         | 0.10                    | 0.0000537                               | 0.2049                                  | 0.0014                   | 0.0978                                  | 0.0014 | 1.002              | 15.3183                                | 0.2143                                 | 0.5421 | 0.0066                                 | 0.88 | 2792                                    | 28        | 2835                                   | 13 | 2865                                    | 11 | 2.5  | 1.8428 | 0.0226 | 0.2060 | 0.0014 |
| HA006-17_1                                  | 1.27                    | 114      | 22        | 69        | 0.20 | 2                         | 0.08                    | 0.0000419                               | 0.2042                                  | 0.0008                   | 0.0530                                  | 0.0010 | 0.978              | 15.5409                                | 0.3006                                 | 0.5520 | 0.0105                                 | 0.98 | 2833                                    | 43        | 2849                                   | 18 | 2860                                    | 6  | 0.9  | 1.8103 | 0.0343 | 0.2051 | 0.0008 |
| HA006-18_2                                  | 1.07                    | 63       | 30        | 42        | 0.49 | 0                         | 0.00                    | 0.0000011                               | 0.2041                                  | 0.0014                   | 0.1326                                  | 0.0011 | 1.004              | 16.2542                                | 0.1438                                 | 0.5378 | 0.0113                                 | 0.94 | 2939                                    | 46        | 2892                                   | 20 | 2859                                    | 11 | -2.8 | 1.7312 | 0.0339 | 0.2045 | 0.0014 |
| HA006B-34_3                                 | 1.24                    | 74       | 11        | 44        | 0.15 | 6                         | 0.32                    | 0.0001708                               | 0.2041                                  | 0.0017                   | 0.0393                                  | 0.0025 | 0.950              | 15.6565                                | 0.2891                                 | 0.5563 | 0.0092                                 | 0.89 | 2851                                    | 38        | 2856                                   | 17 | 2859                                    | 13 | 0.3  | 1.7918 | 0.0296 | 0.2065 | 0.0017 |
| HA006-20_1                                  | 1.32                    | 418      | 54        | 249       | 0.13 | 3                         | 0.03                    | 0.0000136                               | 0.2034                                  | 0.0004                   | 0.0352                                  | 0.0004 | 0.981              | 15.5683                                | 0.2804                                 | 0.5550 | 0.0099                                 | 0.99 | 2846                                    | 41        | 2851                                   | 17 | 2854                                    | 3  | 0.3  | 1.8014 | 0.0322 | 0.2040 | 0.0004 |
| HA006-21_2                                  | 1.14                    | 105      | 34        | 65        | 0.34 | 1                         | 0.04                    | 0.0000223                               | 0.2031                                  | 0.0005                   | 0.0913                                  | 0.0006 | 0.998              | 15.4394                                | 0.2839                                 | 0.5513 | 0.0100                                 | 0.99 | 2831                                    | 42        | 2843                                   | 17 | 2851                                    | 4  | 0.7  | 1.8132 | 0.0320 | 0.2038 | 0.0005 |
| HA006-12_2                                  | 1.31                    | 98       | 41        | 63        | 0.42 | 2                         | 0.07                    | 0.0000380                               | 0.2027                                  | 0.0006                   | 0.1125                                  | 0.0010 | 0.973              | 15.6573                                | 0.1670                                 | 0.5603 | 0.0057                                 | 0.96 | 2868                                    | 24        | 2856                                   | 10 | 2847                                    | 5  | -0.7 | 1.7835 | 0.0182 | 0.2035 | 0.0006 |
| HA006B-49_1                                 | 1.24                    | 111      | 27        | 68        | 0.25 | 2                         | 0.06                    | 0.0000315                               | 0.2021                                  | 0.0008                   | 0.0687                                  | 0.0007 | 1.020              | 15.4345                                | 0.2272                                 | 0.5539 | 0.0079                                 | 0.96 | 2841                                    | 33        | 2842                                   | 14 | 2843                                    | 6  | 0.1  | 1.8044 | 0.0256 | 0.2029 | 0.0008 |
| HA006B-34_2                                 | 1.25                    | 84       | 10        | 51        | 0.12 | 4                         | 0.19                    | 0.0001000                               | 0.2022                                  | 0.0013                   | 0.0322                                  | 0.0018 | 0.994              | 15.6629                                | 0.2688                                 | 0.5618 | 0.0089                                 | 0.92 | 2874                                    | 37        | 2856                                   | 16 | 2843                                    | 11 | -1.1 | 1.7766 | 0.0282 | 0.2038 | 0.0013 |
| HA006-1_1                                   | 1.21                    | 123      | 96        | 82        | 0.80 | 1                         | 0.03                    | 0.0000177                               | 0.2014                                  | 0.0004                   | 0.2171                                  | 0.0011 | 0.999              | 15.0970                                | 0.1574                                 | 0.5438 | 0.0056                                 | 0.99 | 2799                                    | 23        | 2821                                   | 10 | 2837                                    | 3  | 1.3  | 1.8384 | 0.0199 | 0.2020 | 0.0003 |
| HA006B-34_5                                 | 1.28                    | 85       | 10        | 52        | 0.12 | 0                         | 0.02                    | 0.0000092                               | 0.2015                                  | 0.0012                   | 0.0315                                  | 0.0004 | 0.991              | 15.9118                                | 0.2617                                 | 0.5728 | 0.0088                                 | 0.93 | 2919                                    | 36        | 2872                                   | 16 | 2838                                    | 9  | -2.9 | 1.7465 | 0.0268 | 0.2020 | 0.0012 |
| HA006-15_1                                  | 1.14                    | 47       | 26        | 31        | 0.56 | 2                         | 0.13                    | 0.0000692                               | 0.2013                                  | 0.0013                   | 0.1497                                  | 0.0017 | 0.979              | 15.4749                                | 0.1999                                 | 0.5576 | 0.0063                                 | 0.87 | 2857                                    | 26        | 2845                                   | 12 | 2836                                    | 10 | -0.7 | 1.7911 | 0.0201 | 0.2025 | 0.0013 |
| HA006-14_1                                  | 1.12                    | 81       | 41        | 52        | 0.52 | 2                         | 0.07                    | 0.0000395                               | 0.2005                                  | 0.0008                   | 0.1383                                  | 0.0013 | 0.976              | 15.2641                                | 0.1666                                 | 0.5522 | 0.0056                                 | 0.92 | 2834                                    | 23        | 2832                                   | 10 | 2830                                    | 6  | -0.1 | 1.8097 | 0.0183 | 0.2014 | 0.0008 |
| HA006-13_1                                  | 1.14                    | 146      | 103       | 95        | 0.72 | 94                        | 2.53                    | 0.0013901                               | 0.2004                                  | 0.0010                   | 0.1958                                  | 0.0084 | 0.992              | 14.8676                                | 0.1560                                 | 0.5381 | 0.0050                                 | 0.89 | 2776                                    | 21        | 2807                                   | 10 | 2829                                    | 6  | 1.9  | 1.8111 | 0.0169 | 0.2169 | 0.0007 |
| HA006-6_1                                   | 1.15                    | 54       | 29        | 34        | 0.56 | 1                         | 0.11                    | 0.0000369                               | 0.2003                                  | 0.0010                   | 0.1599                                  | 0.0014 | 0.984              | 14.8773                                | 0.2037                                 | 0.5387 | 0.0068                                 | 0.83 | 2778                                    | 29        | 2807                                   | 13 | 2828                                    | 8  | 1.8  | 1.8543 | 0.0235 | 0.2014 | 0.0010 |
| HA006B-16_1                                 | 1.20                    | 68       | 19        | 42        | 0.29 | 2                         | 0.09                    | 0.0000488                               | 0.2003                                  | 0.0010                   | 0.0709                                  | 0.0013 | 1.016              | 15.2443                                | 0.2321                                 | 0.5520 | 0.0079                                 | 0.95 | 2834                                    | 33        | 2831                                   | 14 | 2828                                    | 8  | -0.2 | 1.8098 | 0.0260 | 0.2013 | 0.0010 |
| HA006B-55_1                                 | 1.19                    | 66       | 10        | 39        | 0.15 | 3                         | 0.16                    | 0.0000877                               | 0.1994                                  | 0.0007                   | 0.0395                                  | 0.0016 | 0.976              | 14.9503                                | 0.2289                                 | 0.5438 | 0.0081                                 | 0.97 | 2799                                    | 34        | 2812                                   | 14 | 2821                                    | 5  | 0.8  | 1.8360 | 0.0273 | 0.2009 | 0.0007 |
| HA006-9_1                                   | 1.24                    | 96       | 47        | 61        | 0.51 | 2                         | 0.07                    | 0.0000359                               | 0.1985                                  | 0.0006                   | 0.1401                                  | 0.0011 | 1.012              | 15.1652                                | 0.1541                                 | 0.5543 | 0.0054                                 | 0.96 | 2843                                    | 22        | 2826                                   | 10 | 2813                                    | 4  | -1.1 | 1.8027 | 0.0176 | 0.1993 | 0.0005 |
| HA006-2_1                                   | 1.20                    | 160      | 207       | 116       | 1.33 | 1                         | 0.02                    | 0.0000108                               | 0.1964                                  | 0.0008                   | 0.3671                                  | 0.0008 | 1.008              | 14.5327                                | 0.1561                                 | 0.5366 | 0.0053                                 | 0.92 | 2769                                    | 22        | 2785                                   | 10 | 2796                                    | 7  | 1.0  | 1.8633 | 0.0184 | 0.1970 | 0.0008 |
| <i>Metamorphic mantles/rims</i>             |                         |          |           |           |      |                           |                         |                                         |                                         |                          |                                         |        |                    |                                        |                                        |        |                                        |      |                                         |           |                                        |    |                                         |    |      |        |        |        |        |
| HA006-25_1                                  | 1.22                    | 29       | 10        | 17        | 0.37 | 1                         | 0.20                    | 0.0001089                               | 0.2014                                  | 0.0017                   | 0.1012                                  | 0.0026 | 0.996              | 14.8071                                | 0.3343                                 | 0.5331 | 0.0112                                 | 0.93 | 2755                                    | 47        | 2803                                   | 21 | 2837                                    | 13 | 2.9  | 1.8719 | 0.0393 | 0.2031 | 0.0016 |
| HA006-26_1                                  | 1.24                    | 19       | 6         | 12        | 0.34 | 5                         | 1.01                    | 0.0005452                               | 0.2014                                  | 0.0022                   | 0.0831                                  | 0.0076 | 0.998              | 15.2374                                | 0.3785                                 | 0.5488 | 0.0123                                 | 0.90 | 2820                                    | 51        | 2830                                   | 23 | 2837                                    | 14 | 0.6  | 1.8039 | 0.0403 | 0.2082 | 0.0018 |
| HA006-22_1                                  | 1.24                    | 55       | 21        | 34        | 0.40 | 2                         | 0.11                    | 0.0000580                               | 0.2009                                  | 0.0007                   | 0.1084                                  | 0.0014 | 0.994              | 15.1439                                | 0.2877                                 | 0.5467 | 0.0102                                 | 0.98 | 2811                                    | 42        | 2824                                   | 18 | 2833                                    | 5  | 0.8  | 1.8271 | 0.0342 | 0.2020 | 0.0006 |
| HA006B-40_1                                 | 1.26                    | 84       | 7         | 49        | 0.09 | 88                        | 3.99                    | 0.0022241                               | 0.2005                                  | 0.0026                   | 0.0199                                  | 0.0036 | 0.835              | 15.1319                                | 0.3017                                 | 0.5474 | 0.008                                  |      |                                         |           |                                        |    |                                         |    |      |        |        |        |        |

Supplementary Table 2 - Ion microprobe U/Pb data for zircon from orthogneiss, felsic sheet and pegmatite samples

|                                             | H <sub>2</sub> O <sub>2</sub><br>wt% | U<br>ppm | Th<br>ppm | Pb<br>ppm | Th/U | <sup>204</sup> Pb<br>ppb | f <sub>206</sub><br>(%) | <sup>204</sup> Pb/<br><sup>206</sup> Pb | Corrected Ratios                        |                          |                                         |        |                    | Corrected Ratios                       |                                        |        |        |                                        | Uncorrected                            |    |           |                                        |      |                                         |      |        |        |        |        |
|---------------------------------------------|--------------------------------------|----------|-----------|-----------|------|--------------------------|-------------------------|-----------------------------------------|-----------------------------------------|--------------------------|-----------------------------------------|--------|--------------------|----------------------------------------|----------------------------------------|--------|--------|----------------------------------------|----------------------------------------|----|-----------|----------------------------------------|------|-----------------------------------------|------|--------|--------|--------|--------|
|                                             |                                      |          |           |           |      |                          |                         |                                         | <sup>206</sup> Pb/<br><sup>207</sup> Pb | <sup>206</sup> Pb/<br>1σ | <sup>207</sup> Pb/<br><sup>206</sup> Pb | 1σ     | f <sub>208</sub> X | <sup>207</sup> Pb/<br><sup>235</sup> U | <sup>206</sup> Pb/<br><sup>238</sup> U | 1σ     | ρ      | <sup>206</sup> Pb/<br><sup>238</sup> U | <sup>207</sup> Pb/<br><sup>235</sup> U | 1σ | %<br>Disc | <sup>238</sup> U/<br><sup>206</sup> Pb | 1σ   | <sup>207</sup> Pb/<br><sup>206</sup> Pb | 1σ   |        |        |        |        |
| <b>HA001 (OSGB Grid Ref 106970, 886315)</b> |                                      |          |           |           |      |                          |                         |                                         |                                         |                          |                                         |        |                    |                                        |                                        |        |        |                                        |                                        |    |           |                                        |      |                                         |      |        |        |        |        |
| <i>Inherited grains</i>                     |                                      |          |           |           |      |                          |                         |                                         |                                         |                          |                                         |        |                    |                                        |                                        |        |        |                                        |                                        |    |           |                                        |      |                                         |      |        |        |        |        |
| HA001-2_1                                   | 1.59                                 | 380      | 74        | 217       | 0.20 | 2                        | 0.02                    | 0.0000091                               | 0.1908                                  | 0.0004                   | 0.0549                                  | 0.0002 | 0.998              | 13.9243                                | 0.1925                                 | 0.5294 | 0.0072 | 0.99                                   | 2739                                   | 30 | 2745      | 13                                     | 2748 | 4                                       | 0.3  | 1.8886 | 0.0258 | 0.1912 | 0.0004 |
| HA001-3_1                                   | 1.80                                 | 387      | 27        | 202       | 0.07 | 2                        | 0.02                    | 0.0000130                               | 0.1824                                  | 0.0004                   | 0.0196                                  | 0.0003 | 0.987              | 12.6284                                | 0.1741                                 | 0.5020 | 0.0068 | 0.99                                   | 2622                                   | 29 | 2652      | 13                                     | 2675 | 3                                       | 2.0  | 1.9915 | 0.0271 | 0.1830 | 0.0004 |
| HA001-4_1                                   | 1.57                                 | 409      | 25        | 223       | 0.06 | <1                       | 0.00                    | 0.0000017                               | 0.1907                                  | 0.0009                   | 0.0172                                  | 0.0001 | 0.994              | 13.2552                                | 0.2042                                 | 0.5236 | 0.0074 | 0.95                                   | 2714                                   | 31 | 2734      | 14                                     | 2748 | 7                                       | 1.2  | 1.9099 | 0.0270 | 0.1911 | 0.0009 |
| HA001-5_1                                   | 1.59                                 | 358      | 68        | 195       | 0.19 | 1                        | 0.01                    | 0.0000065                               | 0.1867                                  | 0.0005                   | 0.0533                                  | 0.0003 | 0.994              | 13.0832                                | 0.1876                                 | 0.5084 | 0.0072 | 0.98                                   | 2650                                   | 31 | 2686      | 13                                     | 2712 | 4                                       | 2.3  | 1.9669 | 0.0278 | 0.1871 | 0.0005 |
| <i>High-U Magmatic grains</i>               |                                      |          |           |           |      |                          |                         |                                         |                                         |                          |                                         |        |                    |                                        |                                        |        |        |                                        |                                        |    |           |                                        |      |                                         |      |        |        |        |        |
| HA001-1_1                                   | 2.38                                 | 2716     | 125       | 807       | 0.05 | 13                       | 0.03                    | 0.0000179                               | 0.1024                                  | 0.0002                   | 0.0134                                  | 0.0002 | 0.981              | 4.3443                                 | 0.0594                                 | 0.3077 | 0.0042 | 0.992                                  | 1729                                   | 21 | 1702      | 11                                     | 1668 | 3                                       | -3.7 | 3.2491 | 0.0441 | 0.1029 | 0.0002 |
| HA001-6_1                                   | 2.34                                 | 2424     | 108       | 714       | 0.05 | 4                        | 0.01                    | 0.0000061                               | 0.1024                                  | 0.0001                   | 0.0130                                  | 0.0001 | 0.973              | 4.3074                                 | 0.0587                                 | 0.3051 | 0.0041 | 0.996                                  | 1716                                   | 20 | 1695      | 11                                     | 1668 | 2                                       | -2.9 | 3.2777 | 0.0445 | 0.1027 | 0.0001 |
| HA001B-1_1                                  | 2.30                                 | 2474     | 109       | 737       | 0.05 | 4                        | 0.01                    | 0.0000059                               | 0.1026                                  | 0.0002                   | 0.0132                                  | 0.0001 | 1.001              | 4.3672                                 | 0.0350                                 | 0.3087 | 0.0024 | 0.983                                  | 1734                                   | 12 | 1706      | 7                                      | 1671 | 4                                       | -3.8 | 3.2386 | 0.0250 | 0.1029 | 0.0002 |
| HA001B-2_1                                  | 2.42                                 | 2435     | 104       | 717       | 0.04 | 44                       | 0.13                    | 0.0000679                               | 0.1024                                  | 0.0002                   | 0.0128                                  | 0.0005 | 1.006              | 4.3076                                 | 0.0335                                 | 0.3050 | 0.0023 | 0.981                                  | 1716                                   | 11 | 1695      | 6                                      | 1668 | 3                                       | -2.9 | 3.2745 | 0.0250 | 0.1036 | 0.0001 |
| HA001B-3_1                                  | 3.41                                 | 2893     | 125       | 847       | 0.04 | 133                      | 0.33                    | 0.0001750                               | 0.1020                                  | 0.0002                   | 0.0124                                  | 0.0008 | 0.959              | 4.2666                                 | 0.0335                                 | 0.3033 | 0.0023 | 0.978                                  | 1708                                   | 12 | 1687      | 6                                      | 1661 | 2                                       | -2.8 | 3.2863 | 0.0253 | 0.1046 | 0.0002 |
| HA001B-4_1                                  | 5.90                                 | 2125     | 41        | 642       | 0.02 | 12                       | 0.04                    | 0.0000211                               | 0.1040                                  | 0.0002                   | 0.0052                                  | 0.0002 | 0.909              | 4.5092                                 | 0.0361                                 | 0.3145 | 0.0025 | 0.977                                  | 1763                                   | 12 | 1733      | 7                                      | 1696 | 3                                       | -4.0 | 3.1780 | 0.0249 | 0.1045 | 0.0002 |
| HA001B-5_1                                  | 2.35                                 | 1956     | 78        | 566       | 0.04 | 24                       | 0.09                    | 0.0000476                               | 0.1028                                  | 0.0002                   | 0.0118                                  | 0.0005 | 0.992              | 4.2533                                 | 0.0338                                 | 0.3001 | 0.0023 | 0.961                                  | 1692                                   | 11 | 1684      | 7                                      | 1675 | 4                                       | -1.0 | 3.3295 | 0.0254 | 0.1037 | 0.0002 |
| HA001B-5_2                                  | 3.04                                 | 1926     | 81        | 544       | 0.04 | 193                      | 0.74                    | 0.0003974                               | 0.1021                                  | 0.0005                   | 0.0098                                  | 0.0011 | 0.778              | 4.1145                                 | 0.0410                                 | 0.2924 | 0.0026 | 0.895                                  | 1653                                   | 13 | 1657      | 8                                      | 1662 | 8                                       | 0.5  | 3.3951 | 0.0303 | 0.1077 | 0.0005 |
| HA001B-6_1                                  | 2.26                                 | 1983     | 77        | 583       | 0.04 | 2                        | 0.01                    | 0.0000045                               | 0.1026                                  | 0.0002                   | 0.0116                                  | 0.0001 | 0.998              | 4.3097                                 | 0.0342                                 | 0.3047 | 0.0024 | 0.981                                  | 1715                                   | 12 | 1695      | 7                                      | 1671 | 2                                       | -2.6 | 3.2811 | 0.0256 | 0.1028 | 0.0002 |
| HA001B-7_1                                  | 2.48                                 | 1764     | 65        | 520       | 0.04 | 21                       | 0.08                    | 0.0000445                               | 0.1028                                  | 0.0001                   | 0.0108                                  | 0.0004 | 0.975              | 4.3343                                 | 0.0334                                 | 0.3058 | 0.0023 | 0.988                                  | 1720                                   | 11 | 1700      | 6                                      | 1674 | 3                                       | -2.8 | 3.2870 | 0.0249 | 0.1036 | 0.0001 |
| HA001B-8_1                                  | 2.23                                 | 2496     | 314       | 754       | 0.13 | 3351                     | 8.98                    | 0.0052739                               | 0.0981                                  | 0.0016                   | 0.0064                                  | 0.0006 | 0.170              | 4.1091                                 | 0.0798                                 | 0.3037 | 0.0030 | 0.515                                  | 1709                                   | 15 | 1656      | 16                                     | 1589 | 50                                      | -7.6 | 2.9575 | 0.0259 | 0.1047 | 0.0027 |
| HA001B-9_1                                  | 2.25                                 | 2213     | 91        | 644       | 0.04 | 3                        | 0.01                    | 0.0000055                               | 0.1028                                  | 0.0001                   | 0.0123                                  | 0.0001 | 0.999              | 4.2769                                 | 0.0332                                 | 0.3016 | 0.0023 | 0.988                                  | 1699                                   | 11 | 1689      | 6                                      | 1675 | 3                                       | -1.5 | 3.3148 | 0.0254 | 0.1031 | 0.0001 |
| HA001B-10_1                                 | 3.37                                 | 2265     | 95        | 685       | 0.04 | 5                        | 0.02                    | 0.0000081                               | 0.1036                                  | 0.0001                   | 0.0124                                  | 0.0001 | 0.996              | 4.4712                                 | 0.0358                                 | 0.3131 | 0.0025 | 0.993                                  | 1756                                   | 12 | 1726      | 7                                      | 1689 | 1                                       | -4.0 | 3.1935 | 0.0254 | 0.1039 | 0.0001 |
| HA001B-11_1                                 | 3.13                                 | 2445     | 99        | 662       | 0.04 | 236                      | 0.74                    | 0.0003969                               | 0.1009                                  | 0.0004                   | 0.0125                                  | 0.0011 | 1.027              | 3.9091                                 | 0.0368                                 | 0.2809 | 0.0024 | 0.926                                  | 1596                                   | 12 | 1616      | 8                                      | 1641 | 6                                       | -2.8 | 3.5339 | 0.0308 | 0.1066 | 0.0004 |
| HA001B-12_1                                 | 2.23                                 | 2212     | 90        | 646       | 0.04 | 6                        | 0.02                    | 0.0000105                               | 0.1025                                  | 0.0002                   | 0.0120                                  | 0.0002 | 0.990              | 4.2785                                 | 0.0339                                 | 0.3027 | 0.0024 | 0.982                                  | 1705                                   | 12 | 1689      | 6                                      | 1670 | 2                                       | -2.1 | 3.3030 | 0.0257 | 0.1029 | 0.0002 |
| HA001B-13_1                                 | 2.79                                 | 2636     | 133       | 753       | 0.05 | 8                        | 0.02                    | 0.0000115                               | 0.1004                                  | 0.0001                   | 0.0173                                  | 0.0017 | 1.144              | 4.0984                                 | 0.0345                                 | 0.2960 | 0.0025 | 0.986                                  | 1672                                   | 12 | 1654      | 7                                      | 1631 | 3                                       | -2.5 | 3.3773 | 0.0280 | 0.1008 | 0.0001 |
| HA001B-14_1                                 | 2.42                                 | 3318     | 156       | 1001      | 0.05 | 2                        | 0.00                    | 0.0000027                               | 0.1026                                  | 0.0001                   | 0.0142                                  | 0.0001 | 1.011              | 4.4167                                 | 0.0344                                 | 0.3122 | 0.0024 | 0.988                                  | 1752                                   | 12 | 1715      | 6                                      | 1671 | 2                                       | -4.8 | 3.2027 | 0.0246 | 0.1028 | 0.0001 |
| <b>HA003 (OSGB Grid Ref 103280, 895705)</b> |                                      |          |           |           |      |                          |                         |                                         |                                         |                          |                                         |        |                    |                                        |                                        |        |        |                                        |                                        |    |           |                                        |      |                                         |      |        |        |        |        |
| <i>Magmatic grains</i>                      |                                      |          |           |           |      |                          |                         |                                         |                                         |                          |                                         |        |                    |                                        |                                        |        |        |                                        |                                        |    |           |                                        |      |                                         |      |        |        |        |        |
| HA003-1_1                                   | 1.41                                 | 590      | 228       | 190       | 0.40 | 1                        | 0.02                    | 0.0000081                               | 0.1043                                  | 0.0002                   | 0.1129                                  | 0.0012 | 0.983              | 4.3943                                 | 0.0491                                 | 0.3054 | 0.0033 | 0.98                                   | 1718                                   | 17 | 1711      | 9                                      | 1702 | 4                                       | -1.0 | 3.2736 | 0.0359 | 0.1047 | 0.0002 |
| HA003-2_1                                   | 1.21                                 | 1572     | 1190      | 563       | 0.78 | 1                        | 0.00                    | 0.0000015                               | 0.1041                                  | 0.0002                   | 0.2227                                  | 0.0022 | 0.988              | 4.4688                                 | 0.0424                                 | 0.3113 | 0.0029 | 0.98                                   | 1747                                   | 14 | 1725      | 8                                      | 1698 | 4                                       | -2.9 | 3.2124 | 0.0298 | 0.1043 | 0.0002 |
| HA003-3_1                                   | 1.24                                 | 1846     | 1259      | 652       | 0.70 | 3                        | 0.01                    | 0.0000061                               | 0.1045                                  | 0.0003                   | 0.2043                                  | 0.0037 | 1.007              | 4.5009                                 | 0.0464                                 | 0.3125 | 0.0044 | 0.98                                   | 1753                                   | 21 | 1731      | 12                                     | 1705 | 5                                       | -2.8 | 3.2001 | 0.0447 | 0.1048 | 0.0003 |
| HA003-4_1                                   | 1.28                                 | 2277     | 1643      | 824       | 0.74 | 3                        | 0.01                    | 0.0000054                               | 0.1043                                  | 0.0001                   | 0.2150                                  | 0.0006 | 1.003              | 4.5607                                 | 0.0439                                 | 0.3171 | 0.0030 | 0.99                                   | 1776                                   | 15 | 1742      | 8                                      | 1702 | 2                                       | -4.3 | 3.1530 | 0.0301 | 0.1046 | 0.0001 |
| HA003-5_1                                   | 1.22                                 | 1372     | 1059      | 490       | 0.79 | 4                        | 0.02                    | 0.0000100                               | 0.1043                                  | 0.0002                   | 0.2323                                  | 0.0024 | 1.011              | 4.4518                                 | 0.0423                                 | 0.3096 | 0.0029 | 0.98                                   | 1739                                   | 14 | 1722      | 8                                      | 1701 | 4                                       | -2.2 | 3.2290 | 0.0299 | 0.1046 | 0.0002 |
| HA003-6_1                                   | 1.42                                 | 2251     | 1632      | 830       | 0.74 | 1                        | 0.00                    | 0.0000018                               | 0.1046                                  | 0.0001                   | 0.2194                                  | 0.0003 | 1.021              | 4.6696                                 | 0.0428                                 | 0.3237 | 0.0030 | 1.00                                   | 1808                                   | 14 | 1762      | 8                                      | 1707 | 2                                       | -5.9 | 3.0890 | 0.0282 | 0.1049 | 0.0001 |
| HA003-7_1                                   | 1.22                                 | 1490     | 1035      | 524       | 0.71 | 1                        | 0.00                    | 0.0000023                               | 0.1049                                  | 0.0002                   | 0.2082                                  | 0.0011 | 1.007              | 4.4898                                 | 0.0438                                 | 0.3103 | 0.0030 | 0.98                                   | 1742                                   | 15 | 1729      | 8                                      | 1713 | 3                                       | -1.7 | 3.2223 | 0.0307 | 0.1052 | 0.0002 |
| HA003-8_1                                   | 1.32                                 | 1041     | 560       | 354       | 0.55 | 0                        | 0.00                    | 0.0000017                               | 0.1041                                  | 0.0001                   | 0.1594                                  | 0.0004 | 0.995              | 4.4579                                 | 0.0424                                 | 0.3105 | 0.0029 | 0.99                                   | 1743                                   | 14 | 1723      | 8                                      | 1698 | 3                                       | -2.7 | 3.2025 | 0.0304 | 0.1044 | 0.0001 |
| HA003-9_1                                   | 1.35                                 | 1434     | 781       | 475       | 0.56 | 174                      | 0.86                    | 0.0004625                               | 0.1044                                  | 0.0005                   | 0.1641                                  | 0.0037 | 1.010              | 4.3467                                 | 0.0460                                 | 0.3019 | 0.0028 | 0.98                                   | 1701                                   | 14 | 1702      | 9                                      | 1704 | 9                                       | 0.2  | 3.2837 | 0.0304 | 0.1109 | 0.0005 |
| HA003-10_1                                  | 1.28                                 | 1521     | 943       | 531       | 0.64 | 8                        | 0.03                    | 0.0000184                               | 0.1042                                  | 0.0002                   | 0.1641                                  | 0.0004 | 0.998              | 4.5016                                 | 0.0427                                 | 0.3132 | 0.0029 | 0.98                                   | 1756                                   | 14 | 1731      | 8                                      | 1701 | 3                                       | -3.3 | 3.1918 | 0.0296 | 0.1047 | 0.0002 |
| <b>HA005 (OSGB Grid Ref 103130, 895135)</b> |                                      |          |           |           |      |                          |                         |                                         |                                         |                          |                                         |        |                    |                                        |                                        |        |        |                                        |                                        |    |           |                                        |      |                                         |      |        |        |        |        |
| <i>Inherited cores</i>                      |                                      |          |           |           |      |                          |                         |                                         |                                         |                          |                                         |        |                    |                                        |                                        |        |        |                                        |                                        |    |           |                                        |      |                                         |      |        |        |        |        |
| HA005-1_1                                   | 1.14                                 | 79       | 44        | 50        | 0.58 | 3                        | 0.14                    | 0.0000773                               | 0.1963                                  | 0.0009                   | 0.1627                                  | 0.0021 | 1.032              | 14.5578                                | 0.1969                                 | 0.5379 | 0.0068 | 0.94                                   | 2775                                   | 29 | 2787      | 13                                     | 2795 | 7                                       | 0.7  | 1.8563 | 0.0236 | 0.1976 | 0.0009 |
| HA005-3_1                                   | 1.27                                 | 246      | 124       | 144       | 0.52 | 297                      | 4.87                    | 0.0027398                               | 0.2139                                  | 0.0011                   | 0.1588                                  | 0.0093 | 1.113              | 14.8562                                | 0.1910                                 | 0.5038 | 0.0059 | 0.91                                   | 2630                                   | 25 | 2806      | 12                                     | 2935 | 8                                       | 10.4 | 1.8882 | 0.0201 | 0.2447 | 0.0011 |
| HA005-4_1                                   | 1.20                                 | 51       | 17        | 24        | 0.35 | 7                        | 0.73                    | 0.0003918                               | 0.1867                                  | 0.0015                   | 0.1143                                  | 0.0051 | 1.168              | 10.7632                                | 0.1637                                 | 0.4182 | 0.0054 | 0.84                                   | 2252                                   | 24 | 2503      | 14                                     | 2713 | 12                                      | 17.0 | 2.3740 | 0.0305 | 0.1918 | 0.0014 |
| HA005-4_2                                   | 1.15                                 | 123      | 27        | 68        | 0.23 | 29                       | 1.00                    | 0.0005394                               | 0.1945                                  | 0.0014                   | 0.0638                                  | 0.0048 | 1.018              | 13.5934                                | 0.1877                                 | 0.5068 | 0.0060 | 0.86                                   | 2643                                   | 26 | 2722      | 13                                     | 2780 | 12                                      | 4.9  | 1.9536 | 0.0232 | 0.2014 | 0.0013 |
| HA005-6_                                    |                                      |          |           |           |      |                          |                         |                                         |                                         |                          |                                         |        |                    |                                        |                                        |        |        |                                        |                                        |    |           |                                        |      |                                         |      |        |        |        |        |
